# Supplementary material for: High Body Mass Index and Central Adiposity Is Associated with Increased Risk of Acute Pancreatitis: A Meta-Analysis
Source: PubMed Central journal article supplement — Dig Dis Sci. 2020 Jun 19;66(4):1249–67. doi: 10.1007/s10620-020-06275-6 (PMC7990844; doi:10.1007/s10620-020-06275-6), 2020-06-19

Webappendix for Aune D, Yahya MS, Norat T, Riboli E. Body mass index, abdominal fatness and the risk of pancreatitis: a systematic review and meta-analysis of prospective studies.

## Supplementary text

### PubMed search terms:

- 1) "body mass index" OR body mass index[MeSH] OR BMI OR overweight OR overweight[MeSH] OR obesity OR obesity[MeSH] OR anthropometry OR anthropometry[MeSH] OR fatness OR "body fatness" OR "abdominal fatness" OR "abdominal obesity" OR abdominal obesity[MeSH] OR "waist circumference" OR "hip circumference" OR "waist-to-hip ratio" OR waist-to-hip ratio[MeSH] OR adiposity OR adiposity[MeSH] OR "weight gain" OR weight gain[MeSH] OR "weight change" OR weight change[MeSH] OR "weight loss" OR weight loss[MeSH]
- 2) diabetes OR diabetes[MeSH] OR glucose OR glucose[MeSH] OR "medical history" OR medical history[MeSH]
- 3) "physical activity" OR physical activity[MeSH] OR exercise OR exercise[MeSH] OR sports OR sports[MeSH] OR walking OR walking[MeSH] OR biking OR bicycling OR bicycling[MeSH] OR running OR running[MeSH] OR fitness OR "exercise test" OR exercise test[MeSH] OR inactivity OR sedentary
- 4) smoking OR smoking[MeSH] OR cigarette OR cigarette[MeSH] OR cigarettes OR cigarettes[MeSH] OR smoke OR smoke[MeSH] OR tobacco OR tobacco[MeSH] OR snus OR snuff OR snuff[MeSH] OR "environmental tobacco smoke" OR environmental tobacco smoke[MeSH] OR "passive smoking" OR passive smoking[MeSH] OR "smoking cessation" OR smoking cessation[MeSH]
- 5) pancreatitis OR pancreatitis[MeSH]
- 6) "case-control" OR cohort OR prospective OR longitudinal OR retrospective OR "follow-up" OR "cross-sectional" OR "hazard ratio" OR "hazard ratios" OR "relative risk" OR "relative risks" OR "incidence rate ratio" OR "incidence rate ratios" OR "odds ratio" OR odds ratios OR incidence
- 7) 1 OR 2 OR 3 OR 4
- 8) 7 AND 5 AND 6

## Embase search terms

- 1) body mass index OR BMI OR overweight OR obesity OR anthropometry OR fatness OR body fatness OR abdominal fatness OR abdominal obesity OR waist circumference OR hip circumference OR waist-to-hip ratio OR adiposity OR weight gain OR weight change OR weight loss
- 2) body mass index/ OR BMI/ OR overweight/ OR obesity/ OR anthropometry/ OR fatness/ OR body fatness/ OR abdominal fatness/ OR abdominal obesity/ OR waist circumference/ OR hip circumference/ OR waist-to-hip ratio/ OR adiposity/ OR weight gain/ OR weight change/ OR weight loss/
- 3) diabetes OR glucose OR medical history
- 4) diabetes/ OR glucose/ OR medical history/
- 5) physical activity/ OR exercise/ OR sports/ OR walking/ OR biking/ OR bicycling/ OR running/ OR fitness/ OR exercise test/ OR inactivity/ OR sedentary/
- 6) physical activity OR exercise OR sports OR walking OR biking OR bicycling OR running OR fitness OR exercise test OR inactivity OR sedentary
- 7) smoking OR smoke OR tobacco OR snus OR snuff OR environmental tobacco smoke OR passive smoking OR smoking cessation
- 8) smoking/ OR smoke/ OR tobacco/ OR snus/ OR snuff/ OR environmental tobacco smoke/ OR passive smoking/ OR smoking cessation/
- 9) pancreatitis
- 10) pancreatitis/
- 11) case-control OR cohort OR prospective OR longitudinal OR retrospective OR follow-up OR cross-sectional OR hazard ratio OR hazard ratios OR relative risk OR relative risks OR incidence rate ratio OR incidence rate ratios OR odds ratio OR odds ratios OR incidence
- 12) 1 OR 2 OR 3 OR 4 OR 5 OR 6 OR 7 OR 8
- 13) 9 OR 10
- 14) 12 AND 13 AND 11

Supplementary Table 1. List of excluded studies and exclusion reason

| Exclusion reason                     | References |
|--------------------------------------|------------|
| Abstract                             | (1-6)      |
| Bariatric surgery                    | (7)        |
| Case-control study                   | (8-20)     |
| Cross-sectional study                | (21;22)    |
| Duplicate                            | (23)       |
| Meta-analysis                        | (24)       |
| No risk estimate                     | (25)       |
| Not relevant outcome                 | (26-32)    |
| Patient population                   | (33-78)    |
| Prognosis                            | (79-95)    |
| Readmission for chronic pancreatitis | (96)       |
| Review                               | (97-105)   |
| Studies in children                  | (106;107)  |

#### Reference List

- (1) Gonzalez-Perez A, Schlienger RG, Rodriguez LAG. Risk of acute pancreatitis in association with type 2 diabetes mellitus. *Pharmacoepidemiology and Drug Safety Conference: 26th International Conference on Pharmacoepidemiology and Therapeutic Risk Management Brighton United Kingdom Conference Publication: 2010;(S2-S3):August.*
- (2) Anderson KE, Prizment AE, Jensen EH, Virnig BA, Folsom AR. Risk factors for pancreatitis in older women: The Iowa women's health study (IWHS). *American Journal of Epidemiology Conference: 43rd Annual Meeting of the Society for Epidemiologic Research, SER 2010;01.*
- (3) Su Y-C. Bidirectional relationship between diabetes and acute pancreatitis: A population-based cohort study in Taiwan. *Annals of Emergency Medicine Conference: American College of Emergency Physicians, ACEP 2015;October.*
- (4) Uc A, Zimmerman B, Lowe ME. Impact of obesity on pediatric acute recurrent and chronic pancreatitis. *Journal of Pediatric Gastroenterology and Nutrition Conference: World Congress of Pediatric Gastroenterology, Hepatology and Nutrition 2016;(S280):October.*
- (5) Karb DB. Pancreatitis in type 2 diabetes: A population based analysis of prevalence and risk factors. *Gastroenterology Conference: 2019;(6 Supplement 1).*
- (6) Garcia RG, Moran RA, Bolado CF, Martinez ME, Viejo AA, Ruiz Rebollo ML, Rodriguez Oballe JA, Pascual M, I, Hinojosa GJ, Del Val AA, Hernando Alonso AI, Singh V, et al.

The impact of body mass index and comorbidities on outcomes in acute pancreatitis, results from a multicenter registry of acute pancreatitis. Pancreatology Conference: 15th Pancreatology Spanish Association Meeting, AESPANC 2017;(5 Supplement 1):September.

- (7) Hussan H, Ugbarugba E, Porter K, Noria S, Needleman B, Clinton SK, Conwell DL, Krishna SG. The Type of Bariatric Surgery Impacts the Risk of Acute Pancreatitis: A Nationwide Study. *Clin Transl Gastroenterol* 2018 Sep 12;9(9):179.
- (8) Talamini G, Vaona B, Bassi C, Bovo P, Damoc T, Mastromauro M, Falconi M, Vantini I, Cavallini G, Pederzoli P. Alcohol intake, cigarette smoking, and body mass index in patients with alcohol-associated pancreatitis. *J Clin Gastroenterol* 2000 Dec;31(4):314-7.
- (9) Blomgren KB, Sundstrom A, Steineck G, Wiholm BE. Obesity and treatment of diabetes with glyburide may both be risk factors for acute pancreatitis. *Diabetes Care* 2002 Feb;25(2):298-302.
- (10) Rossi L, Parvin S, Hassan Z, Hildebrand P, Keller U, Ali L, Beglinger C, zad Khan AK, Whitcomb DC, Gyr N. Diabetes mellitus in Tropical Chronic Pancreatitis Is Not Just a Secondary Type of Diabetes. *Pancreatology* 2004;4(5):461-7.
- (11) Midha S, Singh N, Sachdev V, Tandon RK, Joshi YK, Garg PK. Cause and effect relationship of malnutrition with idiopathic chronic pancreatitis: prospective case-control study. *J Gastroenterol Hepatol* 2008 Sep;23(9):1378-83.
- (12) Olesen SS, Frandsen LK, Poulsen JL, Vestergaard P, Rasmussen HH, Drewes AM. The prevalence of underweight is increased in chronic pancreatitis outpatients and associates with reduced life quality. *Nutrition* 2017 Nov;43-44:1-7.
- (13) Lai Y, Yang H, Han W, Guo T, Lv H, Li J, Qian J-M. Cigarette smoking associated with chronic pancreatitis: A case control study in China. *Tobacco Induced Diseases* 2017;15(1):38.
- (14) Natu A, Stevens T, Kang L, Yasinow S, Mansoor E, Lopez R, Glessing B, Remer E, Richards T, Gupta A, Chak A, Lee PJW. Visceral Adiposity Predicts Severity of Acute Pancreatitis. *Pancreas* 2017 Jul;46(6):776-81.
- (15) Shin KY, Lee WS, Chung DW, Heo J, Jung MK, Tak WY, Kweon YO, Cho CM. Influence of obesity on the severity and clinical outcome of acute pancreatitis. *Gut and Liver* 2011;5(3):335-9.
- (16) Chooklin S, Shavarova M. Visceral fat and acute pancreatitis. Pancreatology Conference: Joint Meeting of the International Association of Pancreatology and the Korean Pancreatobiliary Association 2013;July-August.
- (17) Taguchi M, Kubo T, Yamamoto M, Muramatsu K, Yasunaga H, Horiguchi H, Fujimori K, Matsuda S, Fushimi K, Harada M. Body mass index influences the outcome of acute pancreatitis: An analysis based on the Japanese administrative database. *Pancreas* 2014;43(6):863-6.
- (18) Cai F, Cui N, Ma H, Wang X, Qiao G, Liu D. Interleukin-10 -1082A/G polymorphism is associated with the development of acute pancreatitis in a Chinese population. *International journal of clinical and experimental pathology* 2015;8(11):15170-6.
- (19) Kim JS, Kim HJ, Joo MK, Park J-J, Bak Y-T. Relation of obesity and fever in acute pancreatitis. Pancreatology Conference: 48th Annual Meeting of the European Pancreatic Club, EPC 2016;June.
- (20) Bexelius TS, Ljung R, Rodriguez LAG. Type 2 diabetes, high blood pressure and acute pancreatitis. *Hepatobiliary and Pancreatic Diseases International* 2016;15(4):443-5.
- (21) Yang H, Wang L, Shi YH, Sui GT, Wu YF, Lu XQ, Li MY, Xia Q, Bian XX, Li HH, Qian JM. Risk factors of acute pancreatitis in the elderly Chinese population: a population-based cross-sectional study. *J Dig Dis* 2014 Sep;15(9):501-7.
- (22) Ali UA, Issa Y, Hagensars JC, Bakker OJ, van GH, van RB, Besselink MG, Gooszen HG, van Santvoort HC, Boermeester MA. Risk of recurrent pancreatitis and progression to chronic pancreatitis after acute pancreatitis. HPB Conference: 11th World Congress of the International Hepato-Pancreato-Biliary Association Seoul South Korea Conference Publication 2014;16(March):156.

- (23) Lee Y-K, Huang M-Y, Hsu C-Y, Su Y-C. Bidirectional relationship between diabetes and acute pancreatitis: A population-based cohort study in Taiwan. *Medicine (United States)* 2016;95(2):e2448.
- (24) Hong S, Qiwen B, Ying J, Wei A, Chaoyang T. Body mass index and the risk and prognosis of acute pancreatitis: a meta-analysis. *Eur J Gastroenterol Hepatol* 2011 Nov;23(12):1136-43.
- (25) Talamini G, Bassi C, Falconi M, Sartori N, Frulloni L, Di F, V, Vesentini S, Pederzoli P, Cavallini G. Risk of death from acute pancreatitis: Role of early, simple 'routine' data. *International Journal of Pancreatology* 1996;19(1):15-24.
- (26) Anderson LN, Cotterchio M, Gallinger S. Lifestyle, dietary, and medical history factors associated with pancreatic cancer risk in Ontario, Canada. *Cancer Causes and Control* 2009;20(6):825-34.
- (27) Mandai K, Suzuki A, Morikawa S, Kawamura T, Yasuda K. Risk factors for the development of pancreatic ductal adenocarcinoma during the follow-up of branch duct-type intraductal papillary mucinous neoplasms of the pancreas. *Gastroenterology Conference: Digestive Disease Week 2012*;May.
- (28) Simons-Linares CR, Trick W, Attar BM, Zhang H. Morbid obesity is an independent risk factor for AKI in acute pancreatitis. *American Journal of Gastroenterology Conference: 80th Annual Scientific Meeting of the American College of Gastroenterology Honolulu, HI United States Conference Publication 2015*;110:S30.
- (29) Quesada-Vazquez N, Marques-Garcia P, Gonzalez-Cruz II, Munante MEP, Oms L, Esteba MD, Pardillos-Tome A, Bajador E, Moreno O, Cervera JJ, Martinez-Ares D, Bondelle-Bello MP, et al. Influence of comorbidity on the prognosis of acute pancreatitis. *Pancreatology Conference: 47th Annual Meeting of the European Pancreatic Club, EPC 2015*;June.
- (30) Suceveanu AI, Suceveanu AP, Catrinoiu D, Parepa IR, Voinea F, Mazilu L. Diabetes mellitus, obesity and chronic pancreatitis? Independent risk factors for pancreatic adenocarcinoma (PAC) in Romanian Black Sea coast area. *Pancreatology Conference: 47th Annual Meeting of the European Pancreatic Club, EPC 2015*;June.
- (31) Hsu M-T, Lin C-L, Chung W-S. Increased Risk of Acute Coronary Syndrome in Patients with Chronic Pancreatitis. *Medicine (United States)* 2016;95(20):e3451.
- (32) Linares CRS, Attar BM, Trick W, Plata D, Jaiswal P, Wang Y, Zhang H, Bartel MJ. Obesity is an independent risk factor for persistent SIRS and AKI during a first episode of acute pancreatitis. *Gastroenterology Conference: Digestive Disease Week 2016*;April.
- (33) Krishna SG, Hinton A, Oza V, Hart PA, Swee E, El-Dika S, Stanich PP, Hussan H, Zhang C, Conwell DL. Morbid Obesity Is Associated With Adverse Clinical Outcomes in Acute Pancreatitis: A Propensity-Matched Study. *Am J Gastroenterol* 2015 Nov;110(11):1608-19.
- (34) Fujisawa T, Kagawa K, Hisatomi K, Kubota K, Sato H, Nakajima A, Matsuhashi N. Obesity with abundant subcutaneous adipose tissue increases the risk of post-ERCP pancreatitis. *J Gastroenterol* 2016 Sep;51(9):931-8.
- (35) Uc A, Zimmerman MB, Wilschanski M, Werlin SL, Troendle D, Shah U, Schwarzenberg SJ, Rhee S, Pohl JF, Perito ER, Palermo JJ, Ooi CY, et al. Impact of Obesity on Pediatric Acute Recurrent and Chronic Pancreatitis. *Pancreas* 2018 Sep;47(8):967-73.
- (36) Kim EJ, Cho JH, Oh KY, Kim SY, Kim YS. The Risk Factors for Moderately Severe and Severe Post-Endoscopic Retrograde Cholangiopancreatography Pancreatitis According to the Revised Atlanta Classification. *Pancreas* 2017 Oct;46(9):1208-13.
- (37) Fei Y, Gao K, Tu J, Wang W, Zong GQ, Li WQ. Predicting and evaluation the severity in acute pancreatitis using a new modeling built on body mass index and intra-abdominal pressure. *Am J Surg* 2018 Aug;216(2):304-9.
- (38) Dhaliwal AJ, Changela K, Tejada J, Pal SA, Vora S, Chulani S, Anwar S, Hassen G, Malieckal A. Correlation of body mass index and waist-hip ratio with severity and complications of hyperlipidemic acute pancreatitis in Chinese patients. *Gastroenterology Conference: Digestive Disease Week 2016*;April.

- (39) Abdelfatah MM, Koutlas NJ, Gochanour E, Hamed A, Ibrahim M, Barakat M, Mudireddy PR. Impact of body mass index on the incidence and severity of post-endoscopic retrograde cholangiopancreatography pancreatitis. *Ann Gastroenterol* 2019 May;32(3):298-302.
- (40) Jo SI, Chang JH. Acute pancreatitis in patients with severe hypertriglyceridemia: Prevalence and risk factor analysis. *Journal of Gastroenterology and Hepatology Conference: Asian Pacific Digestive Week, APDW 2018;(Supplement 4):November.*
- (41) Mogensen PR, Wolthers BO, Grell K, Schmiegelow K, Frandsen TL. Association between body mass index and pancreatitis in children with acute lymphoblastic leukemia. *Pediatr Blood Cancer* 2018 Aug;65(8):e27071.
- (42) Hanish SI, Petersen RP, Collins BH, Tuttle-Newhall J, Marroquin CE, Kuo PC, Butterly DW, Smith SR, Desai DM. Obesity predicts increased overall complications following pancreas transplantation. *Transplant Proc* 2005 Oct;37(8):3564-6.
- (43) Funnell IC, Bornman PC, Weakley SP, Terblanche J, Marks IN. Obesity: an important prognostic factor in acute pancreatitis. *Br J Surg* 1993 Apr;80(4):484-6.
- (44) Tsai CJ. Is obesity a significant prognostic factor in acute pancreatitis? *Dig Dis Sci* 1998 Oct;43(10):2251-4.
- (45) Suazo-Barahona J, Carmona-Sanchez R, Robles-Diaz G, Milke-Garcia P, Vargas-Vorackova F, Uscanga-Dominguez L, Pelaez-Luna M. Obesity: a risk factor for severe acute biliary and alcoholic pancreatitis. *Am J Gastroenterol* 1998 Aug;93(8):1324-8.
- (46) Martinez J, Sanchez-Paya J, Palazon JM, Aparicio JR, Pico A, Perez-Mateo M. Obesity: a prognostic factor of severity in acute pancreatitis. *Pancreas* 1999 Jul;19(1):15-20.
- (47) Mery CM, Rubio V, Duarte-Rojo A, Suazo-Barahona J, Pelaez-Luna M, Milke P, Robles-Diaz G. Android fat distribution as predictor of severity in acute pancreatitis. *Pancreatology* 2002;2(6):543-9.
- (48) Martinez J, Sanchez-Paya J, Palazon JM, Suazo-Barahona J, Robles-Diaz G, Perez-Mateo M. Is obesity a risk factor in acute pancreatitis? A meta-analysis. *Pancreatology* 2004;4(1):42-8.
- (49) Johnson CD, Toh SK, Campbell MJ. Combination of APACHE-II score and an obesity score (APACHE-O) for the prediction of severe acute pancreatitis. *Pancreatology* 2004;4(1):1-6.
- (50) De WB, Vanmierlo B, Van NY, Delvaux G. Impact of body overweight and class I, II and III obesity on the outcome of acute biliary pancreatitis. *Pancreas* 2006 May;32(4):343-5.
- (51) Martinez J, Johnson CD, Sanchez-Paya J, de ME, Robles-Diaz G, Perez-Mateo M. Obesity is a definitive risk factor of severity and mortality in acute pancreatitis: an updated meta-analysis. *Pancreatology* 2006;6(3):206-9.
- (52) Duarte-Rojo A, Sosa-Lozano LA, Saul A, Herrera-Caceres JO, Hernandez-Cardenas C, Vazquez-Lamadrid J, Robles-Diaz G. Methods for measuring abdominal obesity in the prediction of severe acute pancreatitis, and their correlation with abdominal fat areas assessed by computed tomography. *Aliment Pharmacol Ther* 2010 Jul;32(2):244-53.
- (53) Ammann RW, Raimondi S, Maisonneuve P, Mullhaupt B. Is obesity an additional risk factor for alcoholic chronic pancreatitis? *Pancreatology* 2010;10(1):47-53.
- (54) Maher MM, Dessouky BA. Simplified Early Predictors of Severe Acute Pancreatitis: A Prospective Study. *Gastroenterology Res* 2010 Feb;3(1):25-31.
- (55) Wang SQ, Li SJ, Feng QX, Feng XY, Xu L, Zhao QC. Overweight is an additional prognostic factor in acute pancreatitis: a meta-analysis. *Pancreatology* 2011;11(2):92-8.
- (56) Regunath H, Shivakumar BM, Kurien A, Satyamoorthy K, Pai CG. Anthropometric measurements of nutritional status in chronic pancreatitis in India: comparison of tropical and alcoholic pancreatitis. *Indian J Gastroenterol* 2011 Mar;30(2):78-83.
- (57) Yashima Y, Isayama H, Tsujino T, Nagano R, Yamamoto K, Mizuno S, Yagioka H, Kawakubo K, Sasaki T, Kogure H, Nakai Y, Hirano K, et al. A large volume of visceral adipose tissue leads to severe acute pancreatitis. *J Gastroenterol* 2011 Oct;46(10):1213-8.
- (58) Chen SM, Xiong GS, Wu SM. Is obesity an indicator of complications and mortality in acute pancreatitis? An updated meta-analysis. *J Dig Dis* 2012 May;13(5):244-51.

- (59) O'Leary DP, O'Neill D, McLaughlin P, O'Neill S, Myers E, Maher MM, Redmond HP. Effects of abdominal fat distribution parameters on severity of acute pancreatitis. *World J Surg* 2012 Jul;36(7):1679-85.
- (60) Yoshioka W, Akiyama T, Tanaka K, Kumagai T, Kawaguchi Y, Kawazoe S. Relationship between body mass index and severity of acute pancreatitis in Japanese patients. *Pancreas Conference: 45th Meeting of the American Pancreatic Association and Japan Pancreas Society Kohala Coast, HI United States Conference Publication* 2014;43(8):1428.
- (61) Kumaravel A, Stevens T, Papachristou GI, Muddana V, Bhatt A, Lee PJ, Holmes J, Lopez R, Whitcomb DC, Parsi MA. A Model to Predict the Severity of Acute Pancreatitis Based on Serum Level of Amylase and Body Mass Index. *Clin Gastroenterol Hepatol* 2015 Aug;13(8):1496-501.
- (62) Stimac D, Franjic N, Poropat G, Mikolasevic I, Klobucar MS. Waist circumference correlates with disease severity in acute pancreatitis. *Obesity Facts Conference: 22nd Congress of the European Congress on Obesity, ECO 2015;May*.
- (63) Murata A, Ohtani M, Muramatsu K, Kobori S, Tomioka S, Matsuda S. Impact of obesity on outcomes of paediatric acute pancreatitis based on a national administrative database. *Pediatr Obes* 2016 Jun;11(3):174-80.
- (64) Zadorozhna K, Dronov O, Kovalska I, Burmich K, Tsimbalyuk R, Gorlach A. Impact of obesity on complications and outcome of acute pancreatitis. *Pancreatology Conference: 48th Annual Meeting of the European Pancreatic Club, EPC 2016;June*.
- (65) Kim YJ, Kim DB, Chung WC, Lee JM, Youn GJ, Jung YD, Choi S, Oh JH. Analysis of factors influencing survival in patients with severe acute pancreatitis. *Scandinavian Journal of Gastroenterology* 2017;52(8):904-8.
- (66) Uc A, bu-El-Haija M, Barth B, Bellin M, Fishman D, Freedman S, Garipey C, Giefer M, Gonska T, Heyman M, Himes R, Husain S, et al. Obesity as a risk factor in pediatric acute recurrent and chronic pancreatitis. *Pancreas Conference: 47th Meeting of the American Pancreatic Association United States* 2016;45(10):1543.
- (67) Knapen LM, de Jong RGPJ, Driessen JHM, Keulemans YC, van Erp NP, De Bruin ML, Leufkens HGM, Croes S, de VF. Use of incretin agents and risk of acute and chronic pancreatitis: A population-based cohort study. *Diabetes, Obesity and Metabolism* 2017;19(3):401-11.
- (68) Imrie CW. Prognosis of acute pancreatitis. *Ann Ital Chir* 1995 Mar;66(2):187-9.
- (69) Halonen KI, Leppaniemi AK, Puolakkainen PA, Lundin JE, Kemppainen EA, Hietaranta AJ, Haapiainen RK. Severe acute pancreatitis: prognostic factors in 270 consecutive patients. *Pancreas* 2000 Oct;21(3):266-71.
- (70) Ikeura T, Kato K, Takaoka M, Shimatani M, Kishimoto M, Nishi K, Kariya S, Okazaki K. A body mass index  $\geq 25$  kg/m<sup>2</sup> is associated with a poor prognosis in patients with acute pancreatitis: a study of Japanese patients. *Hepatobiliary Pancreat Dis Int* 2017 Dec 15;16(6):645-51.
- (71) Jin Z, Xu L, Wang X, Yang D. Risk Factors for Worsening of Acute Pancreatitis in Patients Admitted with Mild Acute Pancreatitis. *Med Sci Monit* 2017 Feb 26;23:1026-32.
- (72) Feng F, Tan H, Li X, Qiao Y, Chen C, Lin Y, Li Z, Shen J. Incidence and Risk Factors of Acute Pancreatitis After Scoliosis Surgery: A Prospective Study. *Spine (Phila Pa 1976)* 2018 May 1;43(9):630-6.
- (73) Negi N, Mokta J, Sharma B, Sharma R, Jhobta A, Bodh V, Ranjan A. Clinical Profile and Outcome of Acute Pancreatitis: A Hospital-Based Prospective Observational Study in Subhimalayan State. *The Journal of the Association of Physicians of India* 2018;66(3):22-4.
- (74) Ding Y, Zhang M, Wang L, Yin T, Wang N, Wu J, Zhi J, Chen W, Wu K, Gong W, Xiao W, Xu Z, et al. Association of the hypertriglyceridemic waist phenotype and severity of acute pancreatitis. *Lipids Health Dis* 2019 Apr 9;18(1):93.
- (75) Bandla H, Mohapatra S, Charilaou P, Bassi M, Broder A. Obesity but not nafld is a risk for gallstone pancreatitis: A single center experience. *Gastroenterology Conference: 2019;(6 Supplement 1):2019*.



- (76) Xie J, Xu L, Pan Y, Li P, Liu Y, Pan Y, Xu L. Impact of visceral adiposity on severity of acute pancreatitis: a propensity score-matched analysis. *BMC Gastroenterol* 2019 Jun 13;19(1):87.
- (77) Caamano D, Ocampo C, Alonso F, Zandalazini H, Coturel A, Leyton V, Gutierrez S, Leiro F. Obesity and the risk of severe acute pancreatitis. [Spanish]. *Acta Gastroenterologica Latinoamericana* 2018;48(3):190-6.
- (78) Szentesi A, Parniczky A, Vincze A, Bajor J, Godi S, Sarlos P, Gede N, Izbeki F, Halasz A, Marta K, Dobszai D, Torok I, et al. Metabolic syndrome factors elevate the risk for severity, mortality, and complications in acute pancreatitis. *Pancreatology Conference: 51th Annual Meeting of the European Pancreatic Club 2019;(Supplement 1):June*.
- (79) Cardenas-Jaen K, Moran RA, Garcia-Rayado G, De-La-Iglesia-Garcia D, Martinez-Moneo E, Fort-Martorell E, Lauret-Brana ME, Concepcion-Martin M, Ausania F, Singh VK, de-Madaria E. Influence of age, comorbidity and obesity on outcomes of acute pancreatitis. *Pancreatology Conference: 49th Meeting of European Pancreatic Club, EPC 2017;(3 Supplement 1):July*.
- (80) Stojanovic M, Svorcan P, Stevanovic P, Karamarkovic A, Ladjevic N, Jankovic R. Mortality predictors in patients with acute pancreatitis. *Anaesthesiology Intensive Therapy Conference: 8th World Congress of the Abdominal Compartment Society, WCACS 2017;(Supplement 1):2017*.
- (81) Ikeura T, Kato K, Takaoka M, Shimatani M, Kishimoto M, Nishi K, Kariya S, Okazaki K. A body mass index  $\geq 25$  kg/m<sup>2</sup> is associated with a poor prognosis in patients with acute pancreatitis: a study of Japanese patients. *Hepatobiliary and Pancreatic Diseases International* 2017;16(6):645-51.
- (82) Moran R, Garcia-Rayado G, Concejo FB, Martinez-Moneo E, Viejo-Almanzor A, Ruiz-Rebollo ML, Rodriguez-Oballe JA, Pascual I, Hinojosa-Guadix J, Del VA, Hernando-Alonso AI, Singh V, et al. Impact of body mass index and comorbidities on outcomes in acute pancreatitis, results from a multicenter spanish prospective registry of acute pancreatitis. *Gastroenterology Conference: Digestive Disease Week 2017;(5 Supplement 1):April*.
- (83) Szentesi A, Parniczky A, Vincze A, Bajor J, Godi S, Sarlos P, Gede N, Izbeki F, Halasz A, Illes D, Kui B, Marta K, et al. Metabolic syndrome elevates the risk for mortality and severity in acute pancreatitis. *United European Gastroenterology Journal Conference: 26th United European Gastroenterology Week, UEG 2018;(8 Supplement):October*.
- (84) Xie J, Xu L. Impact of visceral adiposity on severity of acute pancreatitis. *United European Gastroenterology Journal Conference: 26th United European Gastroenterology Week, UEG 2018;(8 Supplement):October*.
- (85) Moran RA, Garcia-Rayado G, De L, I, Martinez-Moneo E, Fort-Martorell E, Lauret-Brana E, Concepcion-Martin M, Ausania F, Prieto-Martinez C, Gonzalez-de-Cabo M, Quesada-Vazquez N, Marcaide-Ruiz-de-Apodaca MA, et al. Influence of age, body mass index and comorbidity on major outcomes in acute pancreatitis, a prospective nation-wide multicentre study. *United European Gastroenterology Journal* 2018;6(10):1508-18.
- (86) Dronov O, Kovalska I, Zadorozhna K, Gorlach A, Zemszkova M. Impact of obesity on the prognosis of an acute pancreatitis. *Pancreatology Conference: 50th Jubilee Meeting of the European Pancreatic Club, EPC 2018;(4 Supplement 1):June*.
- (87) Kroner PT, Thompson CC. The impact of body mass index on outcomes of patients with acute biliary pancreatitis undergoing ERCPA nationwide analysis. *Gastrointestinal Endoscopy Conference: Digestive Disease Week, DDW 2018;(6 Supplement 1):June*.
- (88) Smeets XJNM, Knoester I, Grooteman KV, Singh VK, Banks PA, Papachristou GI, Duarte-Rojo A, Robles-Diaz G, Kievit W, Besselink MGH, Verdonk RC, van Santvoort HC, et al. The association between obesity and outcomes in acute pancreatitis: an individual patient data meta-analysis. *Eur J Gastroenterol Hepatol* 2019 Mar;31(3):316-22.
- (89) Wang D, Prichard W, Barkin JA, Stein A, Reddy S, Barkin JS. Elevated body mass index increases risk of mortality in patients with acute pancreatitis: A systematic review and meta-analysis. *Gastroenterology Conference: 2019;(6 Supplement 1):2019*.

- (90) Kroner PT, Kesler AM, Thompson CC. Acute pancreatitis and bmi: Mortality rates are highest in malnutrition with an apparent obesity paradox. *Gastroenterology Conference: 2019;(6 Supplement 1):2019.*
- (91) Shah AR, Bilal M, Umar S, Singh S, Ali R, Chowdhry M, Hayat M, Abougergi MS. Obesity prolongs hospitalization in chronic pancreatitis. *Gastroenterology Conference: 2019;(6 Supplement 1):May.*
- (92) Kim SB, Kim KH, Kim TN. Does obesity effect severity and outcomes of pancreatitis in Korean patients with acute gallstone pancreatitis. *Pancreatology Conference: 51th Annual Meeting of the European Pancreatic Club 2019;(Supplement 1):June.*
- (93) Dobszai D, Matrai P, Gyongyi Z, Matuz M, Csupor D, Bajor J, Eross B, Miko A, Szako L, Meczker A, Hagendorn R, Marta K, et al. Body-mass index correlates with severity and mortality in acute pancreatitis: A meta-analysis. *Pancreatology Conference: 50th Jubilee Meeting of the European Pancreatic Club, EPC 2018;(4 Supplement 1):June.*
- (94) Dobszai D, Matrai P, Gyongyi Z, Csupor D, Bajor J, Eross B, Miko A, Szako L, Meczker A, Hagendorn R, Marta K, Szentesi A, et al. Body-mass index correlates with severity and mortality in acute pancreatitis: A meta-analysis. *World J Gastroenterol 2019 Feb 14;25(6):729-43.*
- (95) Dobszai D, Matrai P, Gyongyi Z, Eross B, Miko A, Szako L, Csupor D, Bajor J, Meczker A, Hagendorn R, Marta K, Szentesi A, et al. Obesity in acute pancreatitis: a meta-analysis based on 9,997 patients. *Pancreatology Conference: 51th Annual Meeting of the European Pancreatic Club 2019;(Supplement 1):June.*
- (96) Shah R, Haydek C, Mulki R, Qayed E. Incidence and predictors of 30-day readmissions in patients hospitalized with chronic pancreatitis: A nationwide analysis. *Pancreatology 2018;18(4):386-93.*
- (97) Spanier BW, Dijkgraaf MG, Bruno MJ. Epidemiology, aetiology and outcome of acute and chronic pancreatitis: An update. *Best Pract Res Clin Gastroenterol 2008;22(1):45-63.*
- (98) Abu HM, Armstrong T. The impact of obesity on the course and outcome of acute pancreatitis. *Obes Surg 2008 Mar;18(3):326-8.*
- (99) Talukdar R, Vege SS. Recent developments in acute pancreatitis. *Clin Gastroenterol Hepatol 2009 Nov;7(11 Suppl):S3-S9.*
- (100) Bonfrate L, Wang DQ, Garruti G, Portincasa P. Obesity and the risk and prognosis of gallstone disease and pancreatitis. *Best Pract Res Clin Gastroenterol 2014 Aug;28(4):623-35.*
- (101) Grigor'eva IN, Efimova OV, Suvorova TS, Tov NL. [Pancreatitis, pancreatic cancer and obesity: hypothesis and facts]. *Eksp Klin Gastroenterol 2014;(9):4-10.*
- (102) Alsamarrai A, Das SL, Windsor JA, Petrov MS. Factors that affect risk for pancreatic disease in the general population: a systematic review and meta-analysis of prospective cohort studies. *Clin Gastroenterol Hepatol 2014 Oct;12(10):1635-44.*
- (103) Cruz-Monserrate Z, Conwell DL, Krishna SG. The Impact of Obesity on Gallstone Disease, Acute Pancreatitis, and Pancreatic Cancer. *Gastroenterol Clin North Am 2016 Dec;45(4):625-37.*
- (104) Khatua B, El-Kurdi B, Singh VP. Obesity and pancreatitis. *Current Opinion in Gastroenterology 2017;33(5):374-82.*
- (105) Eibl G, Cruz-Monserrate Z, Korc M, Petrov MS, Goodarzi MO, Fisher WE, Habtezion A, Lugea A, Pandol SJ, Hart PA, Andersen DK. Diabetes Mellitus and Obesity as Risk Factors for Pancreatic Cancer. *J Acad Nutr Diet 2018 Apr;118(4):555-67.*
- (106) Pillai C, Yafi M, Rubio N, Rodziyevska O, Hashmi S, Eissa M. The association of obesity with pancreatitis in children. *Obesity Facts Conference: 25th European Congress on Obesity, ECO 2018;(Supplement 1):May.*
- (107) Mogensen PR, Wolthers BO, Grell K, Helt LR, Raja RA, Taskinen M, Vaitkeviciene GE, Albertsen BK, Korgvee LT, Lund B, Jonsson OG, Harila-Saari A, et al. Association between body mass index and pancreatitis in children with acute lymphoblastic leukemia. *Pediatric Blood and Cancer Conference: 50th Congress of the International Society of Paediatric Oncology, SIOP 2018;(Supplement 2):November.*

Supplementary table 2. Body mass index and acute pancreatitis, relative risks and 95% confidence intervals from the nonlinear dose-response analysis

|                           | Main analysis    | Sensitivity analysis<br>excluding Korean study |
|---------------------------|------------------|------------------------------------------------|
| BMI                       | RR (95% CI)      | RR (95% CI)                                    |
| 17.5                      | 1.25 (1.00-1.56) | 0.88 (0.73-1.06)                               |
| 18.5                      | 1.15 (0.97-1.35) | 0.90 (0.79-1.02)                               |
| 20.0                      | 1.05 (0.96-1.14) | 0.93 (0.88-0.99)                               |
| 22.0                      | 1.00             | 1.00                                           |
| 22.5                      | 1.00 (0.98-1.02) | 1.02 (1.01-1.03)                               |
| 25.0                      | 1.04 (0.93-1.16) | 1.14 (1.09-1.18)                               |
| 27.5                      | 1.15 (0.94-1.41) | 1.28 (1.22-1.34)                               |
| 30.0                      | 1.34 (1.01-1.79) | 1.45 (1.39-1.51)                               |
| 32.5                      | 1.62 (1.11-2.37) | 1.65 (1.60-1.71)                               |
| 35.0                      | 2.02 (1.26-3.25) | 1.89 (1.83-1.95)                               |
| 37.5                      | 2.58 (1.45-4.59) | 2.16 (2.07-2.25)                               |
| 40.0                      | 3.35 (1.69-6.64) | 2.47 (2.30-2.66)                               |
| p <sub>nonlinearity</sub> | <0.0001          | 0.001                                          |

Supplementary table 3. Waist circumference and acute pancreatitis, relative risks and 95% confidence intervals from the nonlinear dose-response analysis

| WC                        | RR (95% CI)      |
|---------------------------|------------------|
| 69                        | 1.00             |
| 70                        | 1.06 (1.03-1.08) |
| 75                        | 1.33 (1.21-1.46) |
| 80                        | 1.62 (1.40-1.87) |
| 85                        | 1.93 (1.63-2.29) |
| 90                        | 2.28 (1.90-2.75) |
| 95                        | 2.66 (2.19-3.23) |
| 100                       | 3.08 (2.49-3.83) |
| 105                       | 3.55 (2.75-4.59) |
| 110                       | 4.08 (2.95-5.64) |
| p <sub>nonlinearity</sub> | 0.19             |



Supplementary Figure 1. Funnel plot of BMI and acute pancreatitis

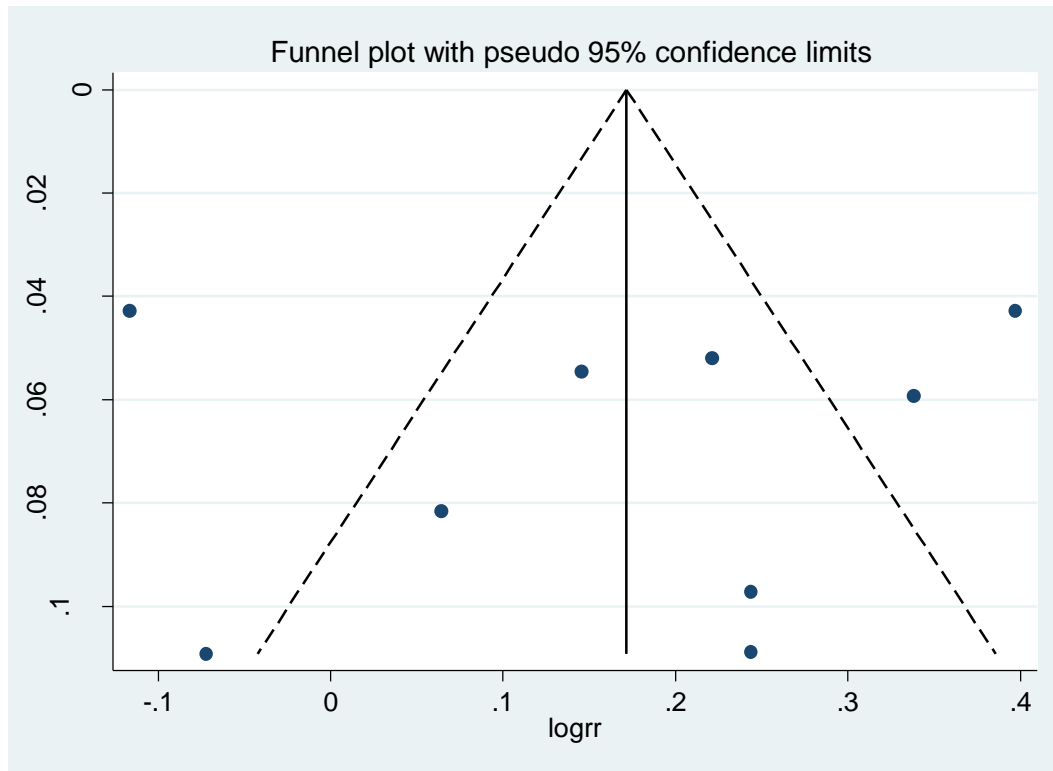

Supplementary Figure 2. Influence analysis excluding one study at a time

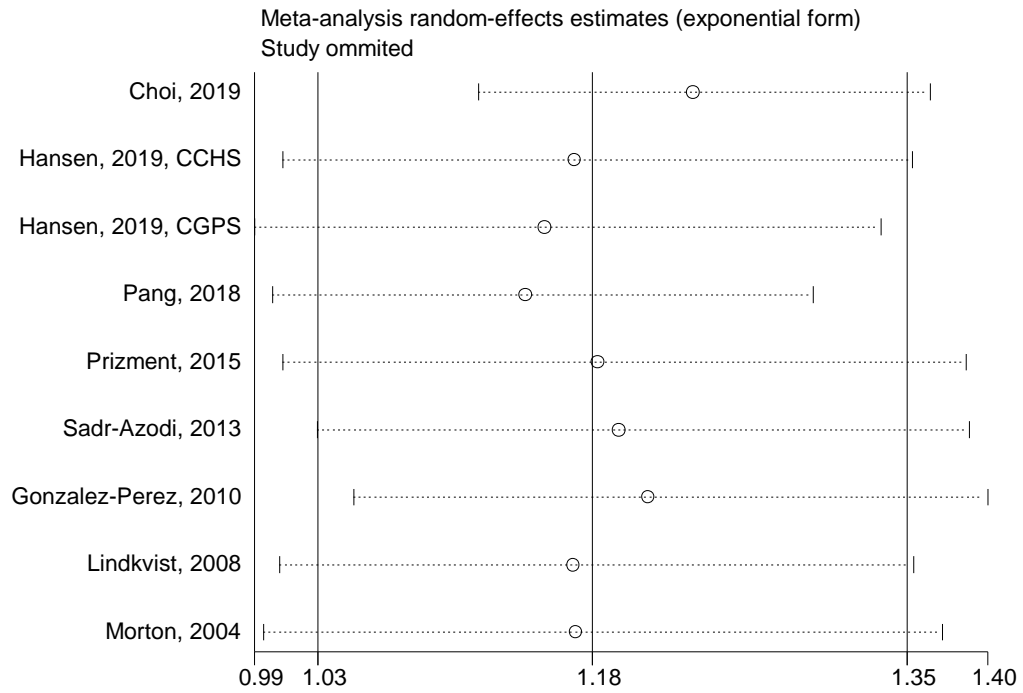

| Study omitted               | Estimate  | [95% Conf. Interval]   |
|-----------------------------|-----------|------------------------|
| Choi, 2019 (2019)           | 1.2351166 | 1.1168832 - 1.3658663  |
| Hansen, 2019, CCHS (2019)   | 1.1697131 | 1.0088975 - 1.3561624  |
| Hansen, 2019, CGPS (2019)   | 1.1532032 | 0.99331123 - 1.3388327 |
| Pang, 2018 (2018)           | 1.1425717 | 1.003206 - 1.3012979   |
| Prizment, 2015 (2015)       | 1.1824709 | 1.0089624 - 1.3858173  |
| Sadr-Azodi, 2013 (2013)     | 1.1942681 | 1.0279 - 1.3875633     |
| Gonzalez-Perez, 2010 (2010) | 1.2103428 | 1.047999 - 1.3978348   |
| Lindkvist, 2008 (2008)      | 1.1691473 | 1.0073425 - 1.3569419  |
| Morton, 2004 (2004)         | 1.1706042 | 0.99830061 - 1.3726469 |
| Combined                    | 1.1798485 | 1.0285269 - 1.3534333  |

Supplementary figure 3. BMI and acute pancreatitis, sensitivity analysis excluding the study by Choi et al, 2019

**A**

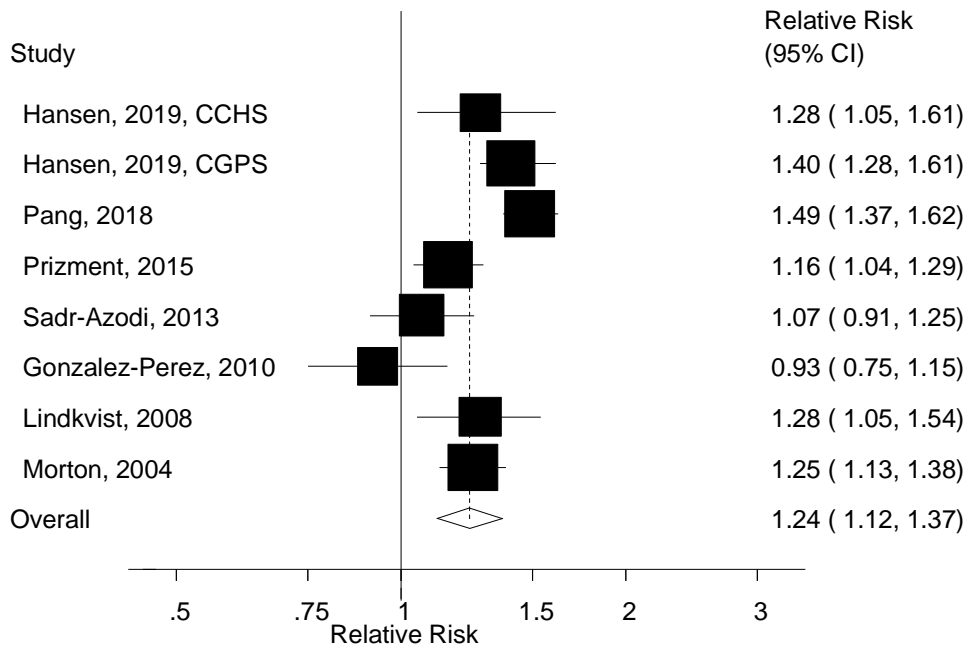

**B**

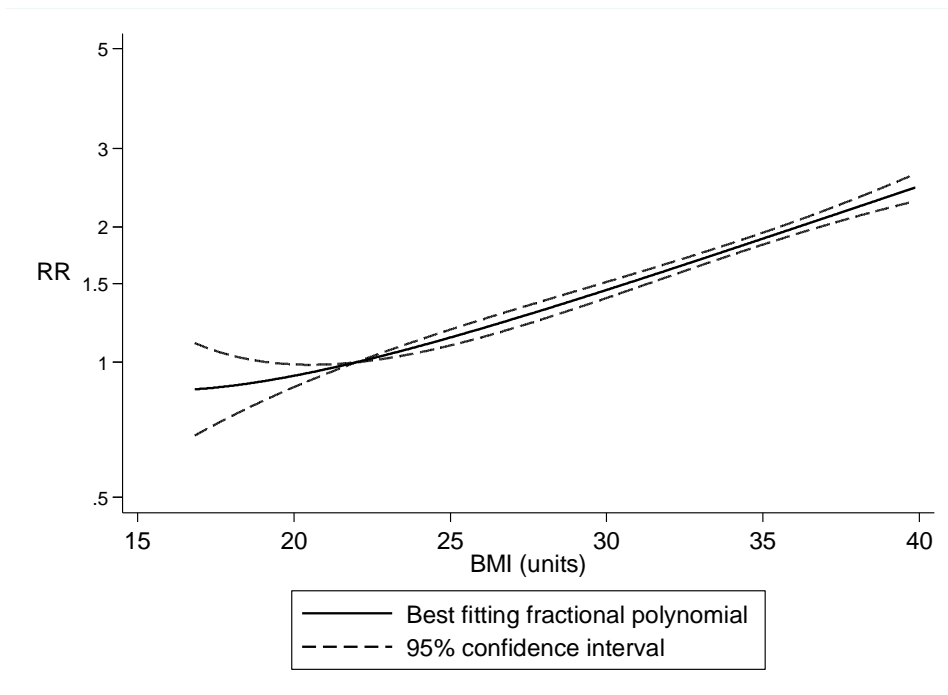



Supplementary Figure 4. BMI and acute pancreatitis, sensitivity analysis using never smokers rather than the full population for the study by Choi et al, 2019.

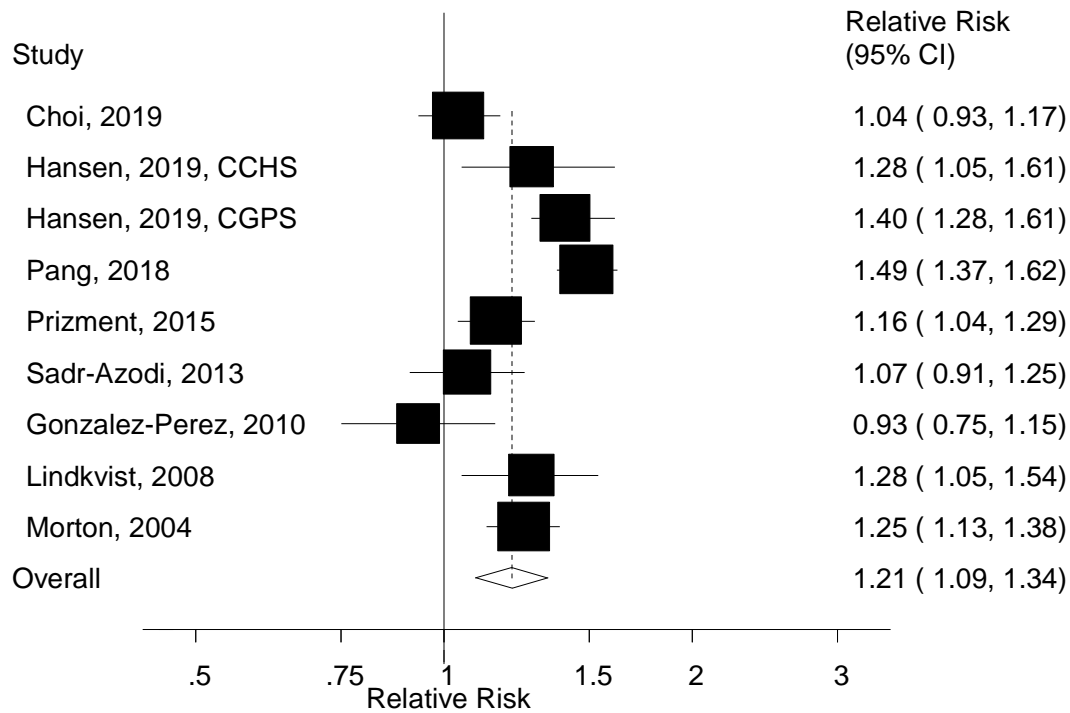

Supplementary Figure 5. BMI and acute pancreatitis, sensitivity analysis excluding categories below the reference category when the lowest category was not the reference category.

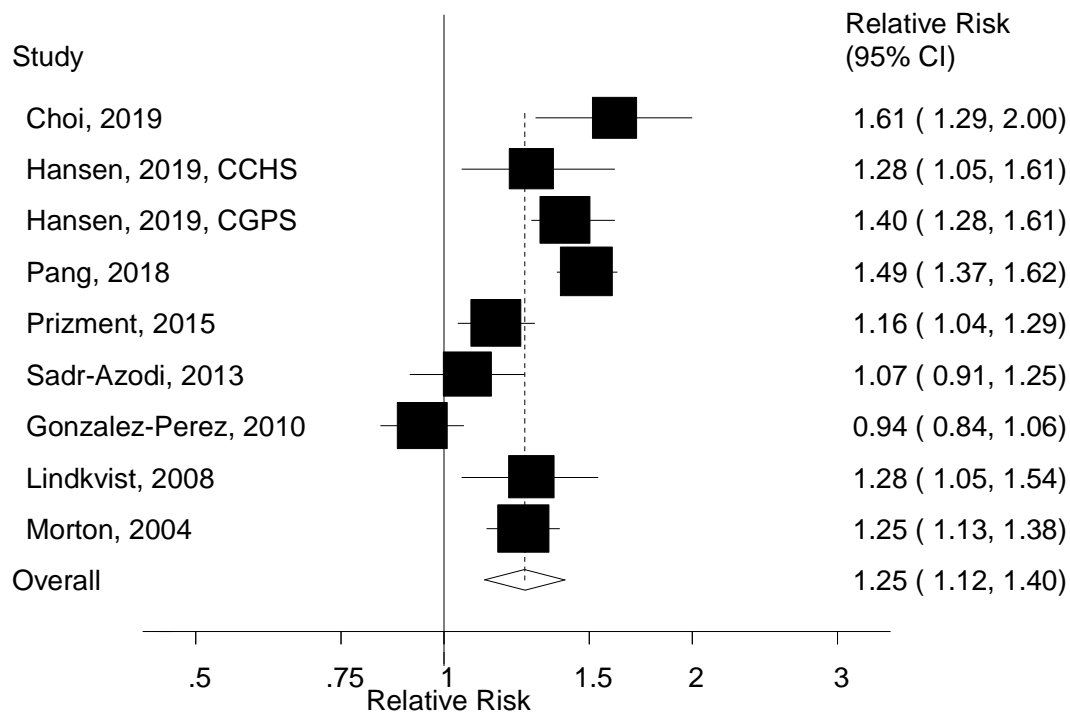

Supplementary Figure 6. BMI and gallstone-related pancreatitis

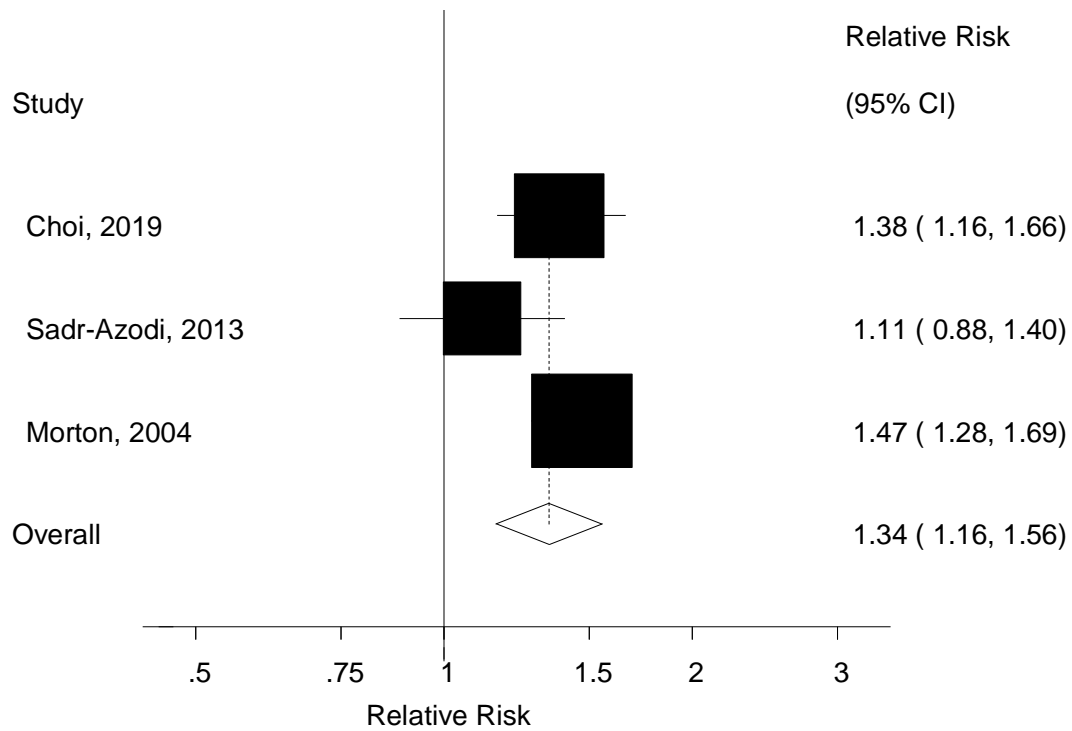

Supplementary Figure 7. BMI and non-gallstone-related pancreatitis

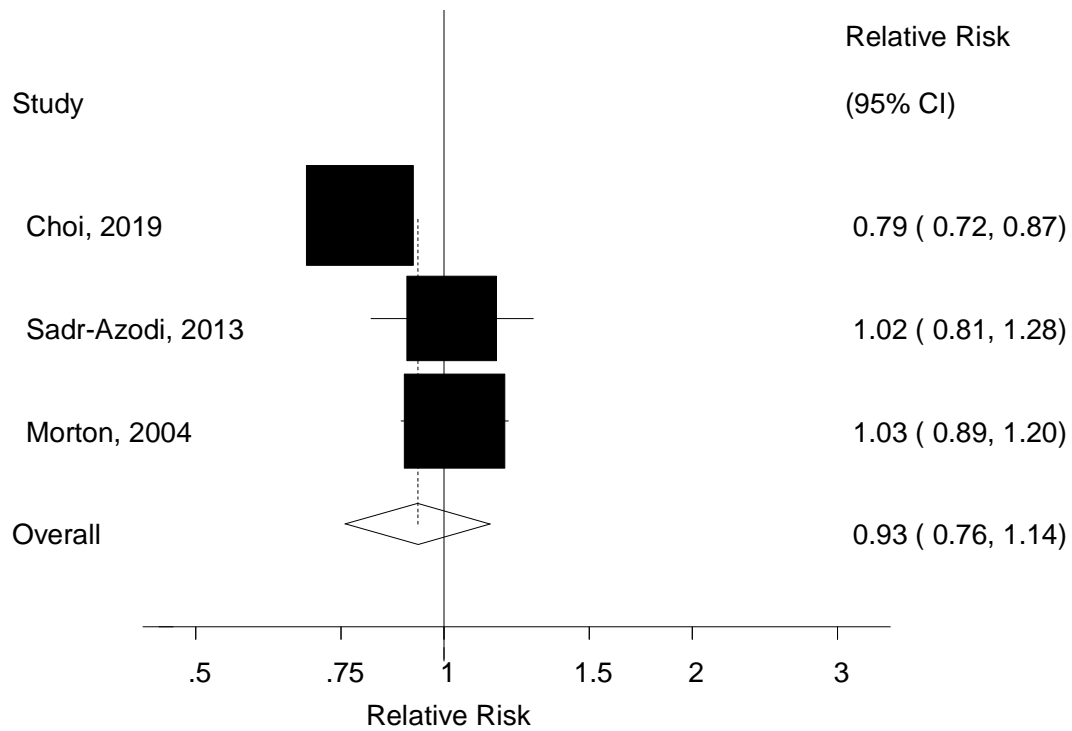

Supplementary Figure 8. BMI and chronic pancreatitis

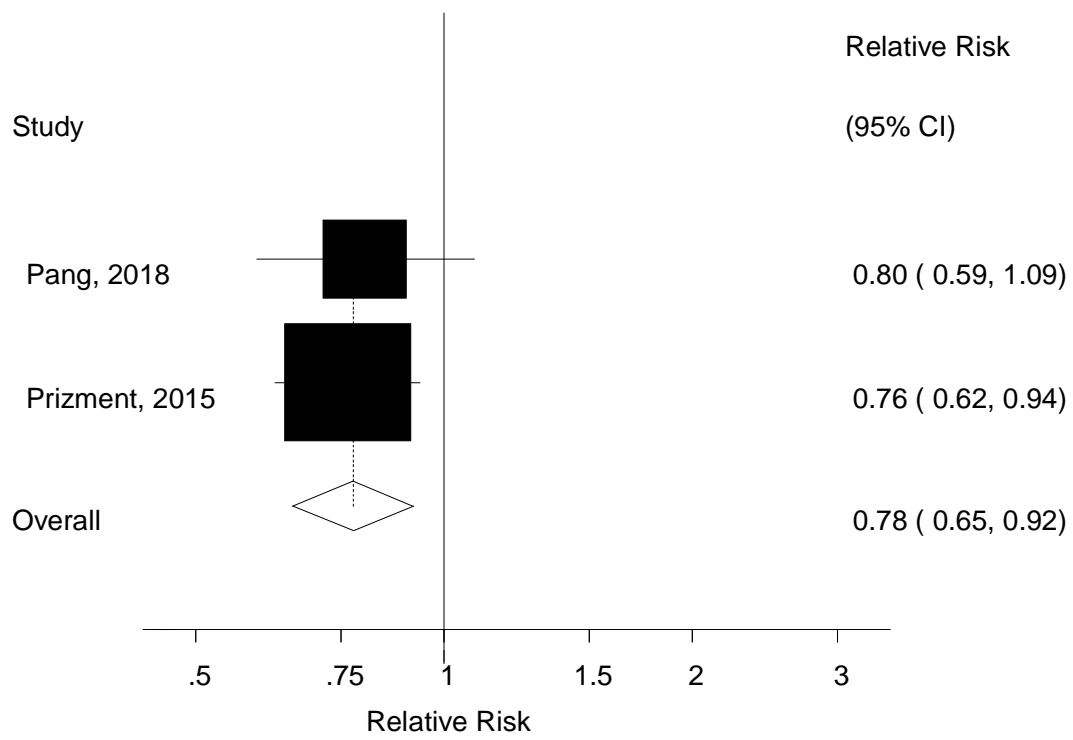

Supplement: 10620_2020_6275_MOESM1_ESM.pdf [file 10620_2020_6275_MOESM1_ESM.pdf]
